# Supplementary material
Source: Springer Nature journal article supplement (https://www.springermedizin.de/resource/supplementary/12889_2012_3805_MOESM1_ESM.pdf/9493200)

# INTERVENTION SCHOOLS

## Class

# CONTROL SCHOOLS

## Class

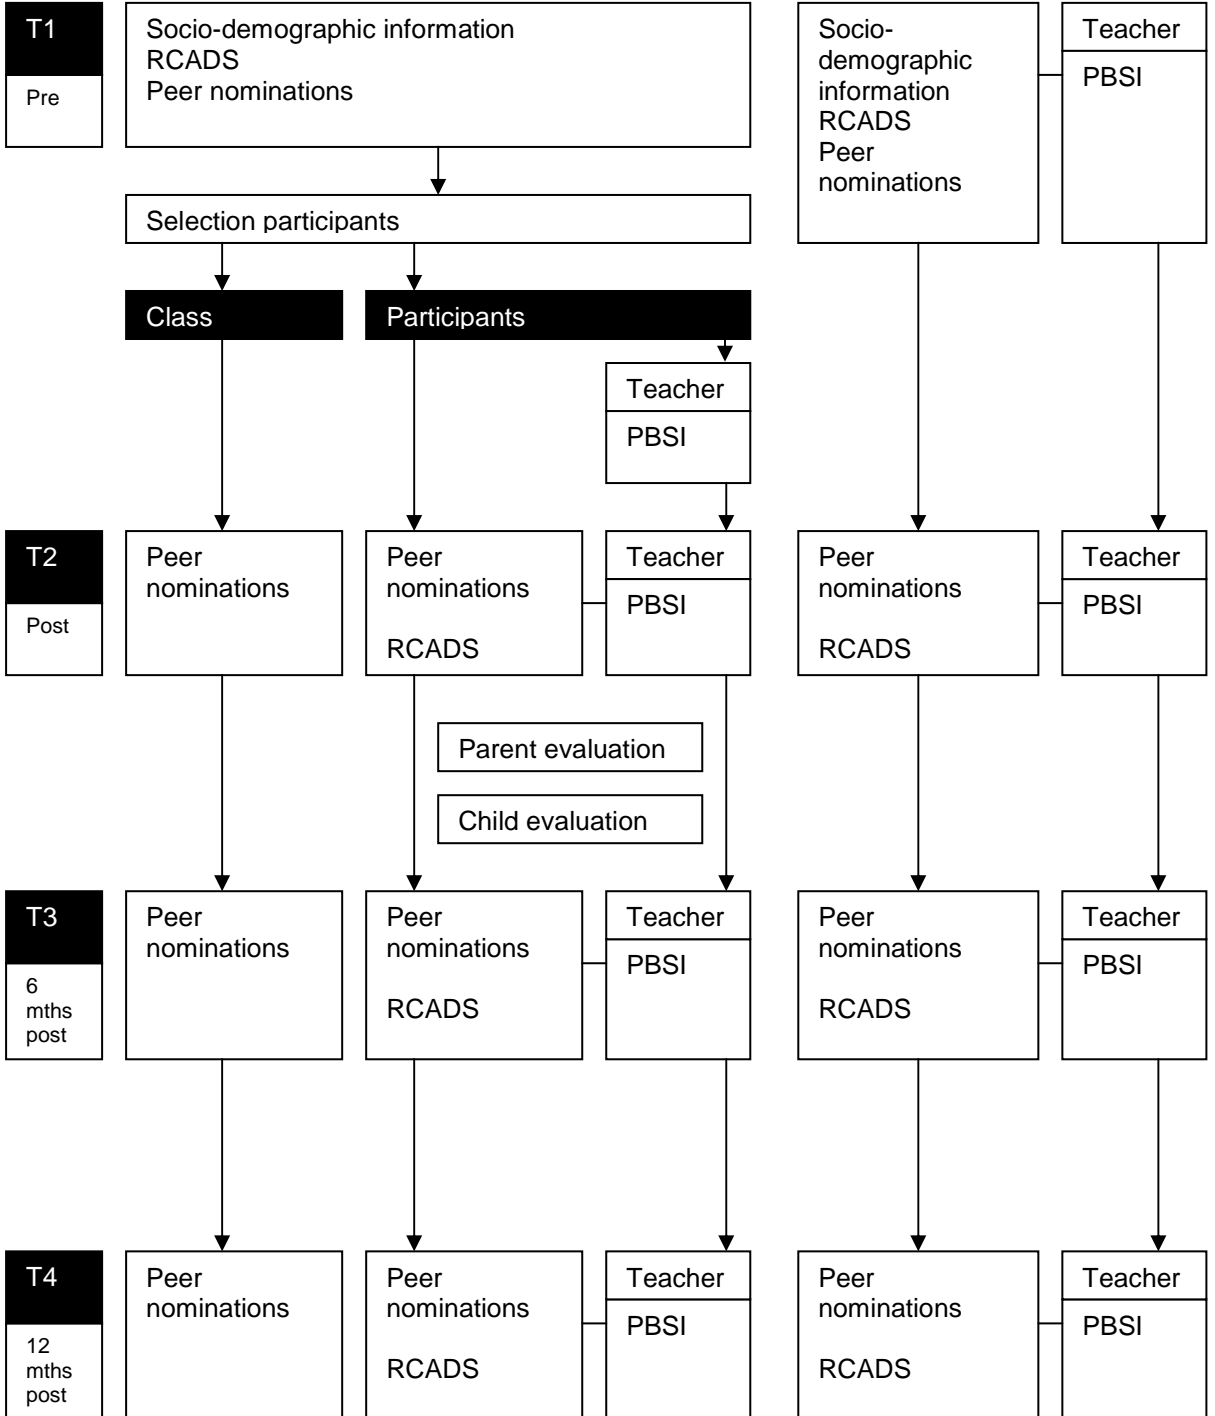

Supplement: MOESM1 [file 9493200]
